# Supplementary material for: Evaluation of liver regeneration and post-hepatectomy liver failure after hemihepatectomy in patients with hepatocellular carcinoma
Source: Oxford University Press journal article supplement (doi:10.1042/bsr20190088), 2019-08-01
Supplement: bsr-2019-0088_supp.pdf [file bsr-2019-0088_supp.pdf]

Resected Liver  
Tumor  
FLR

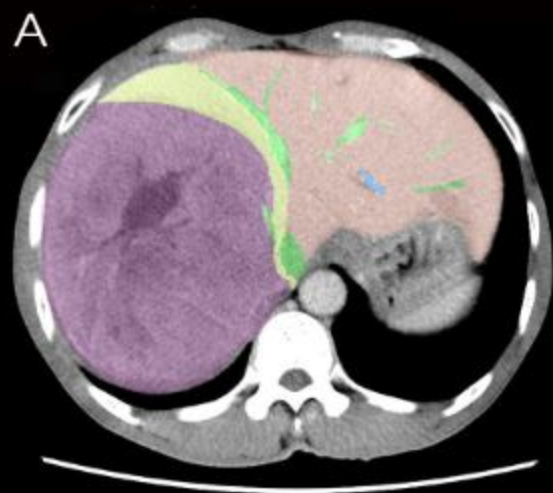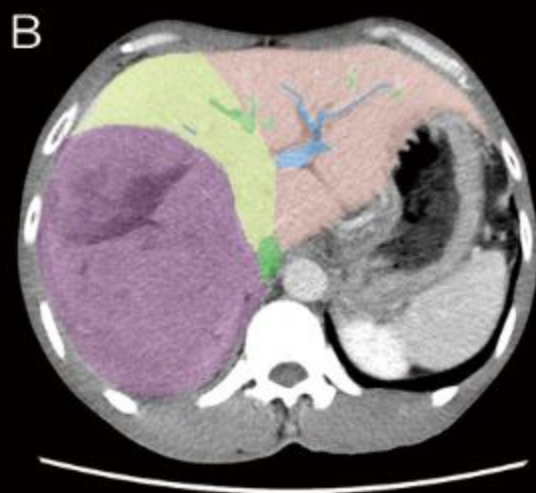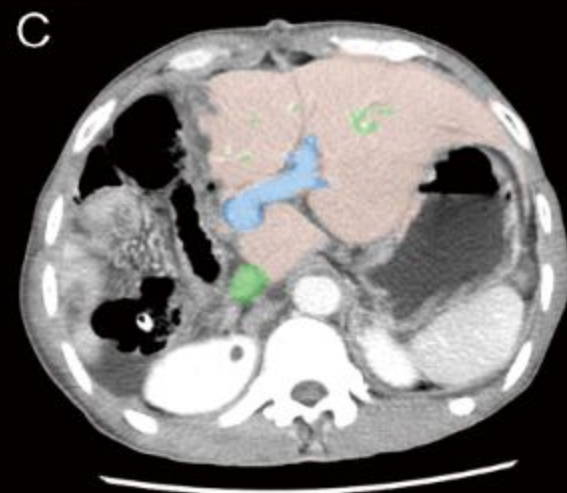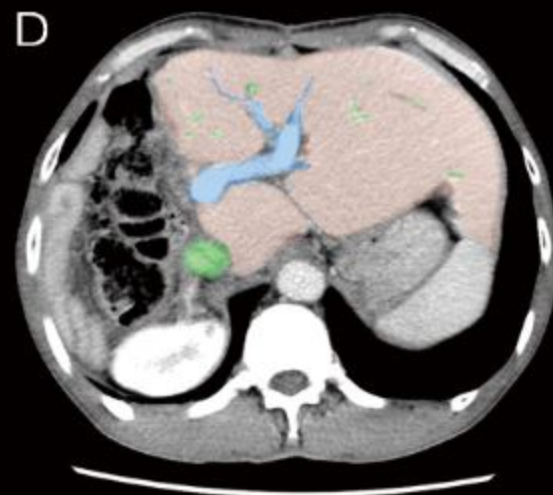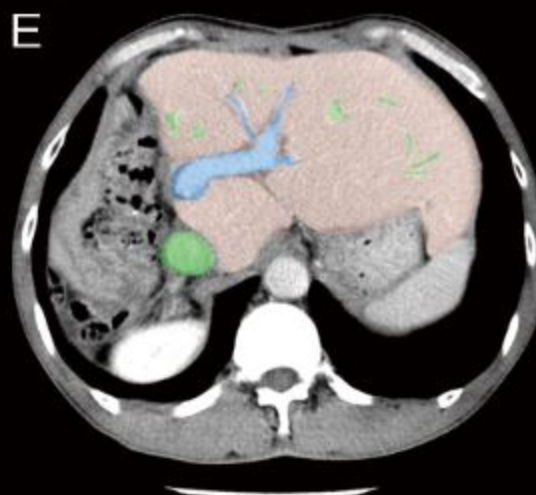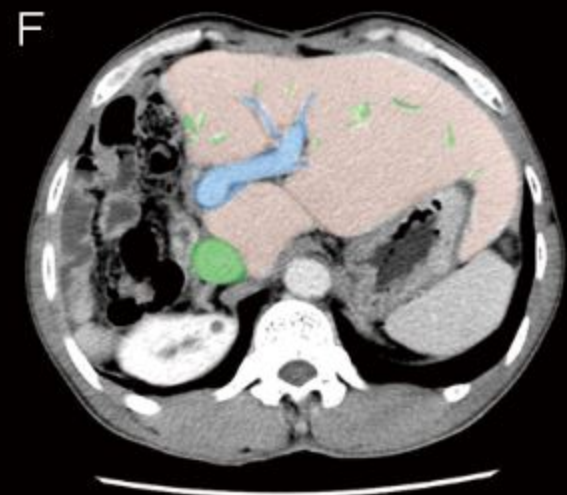

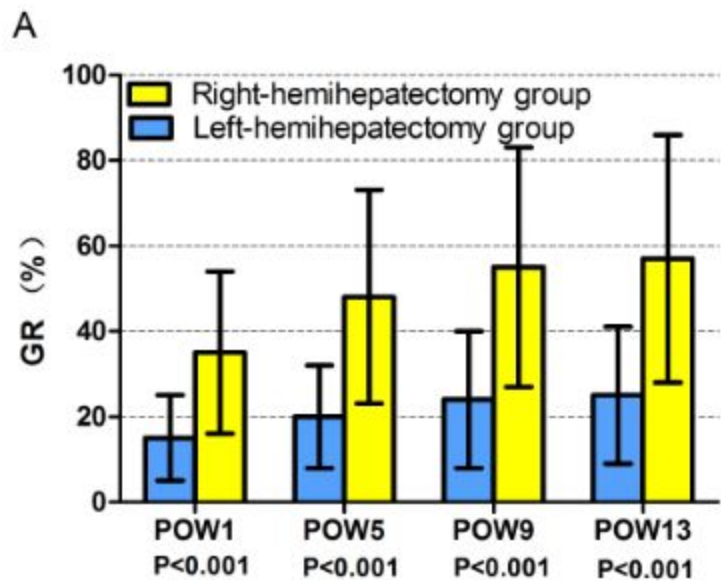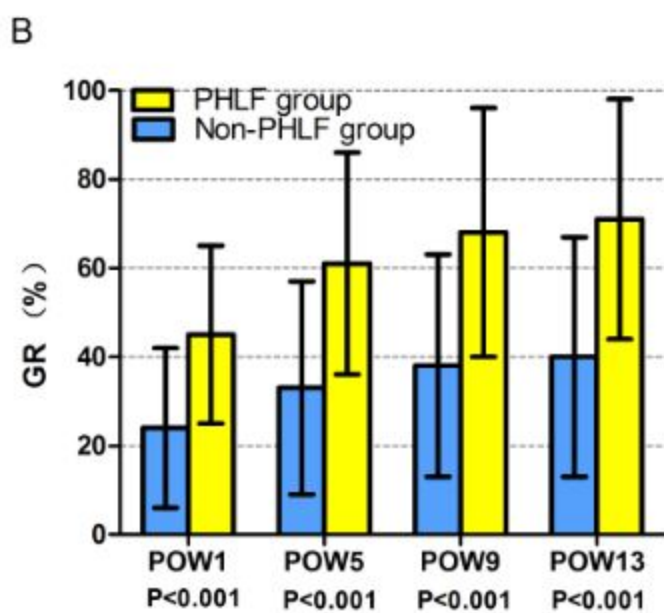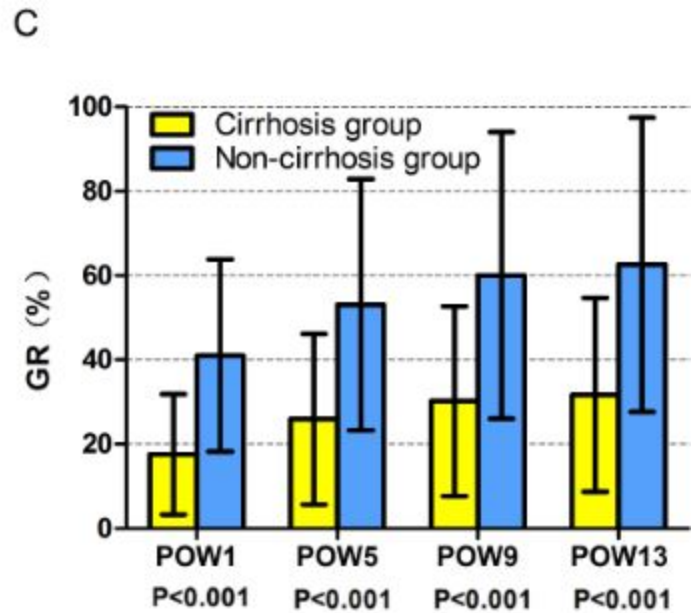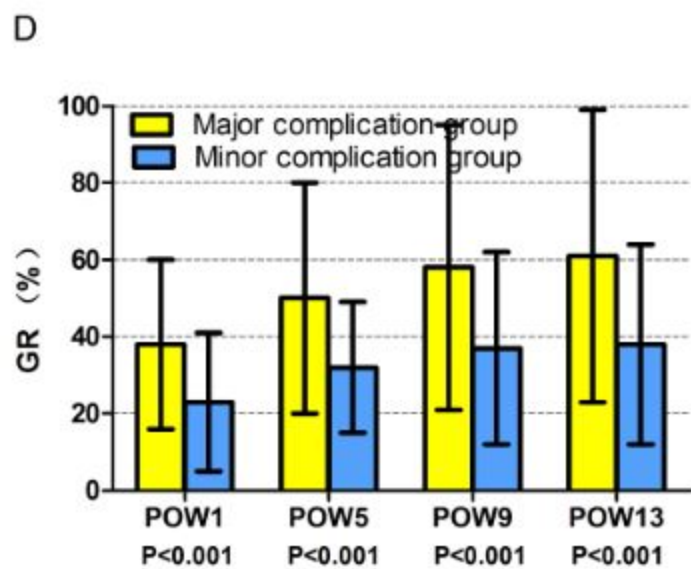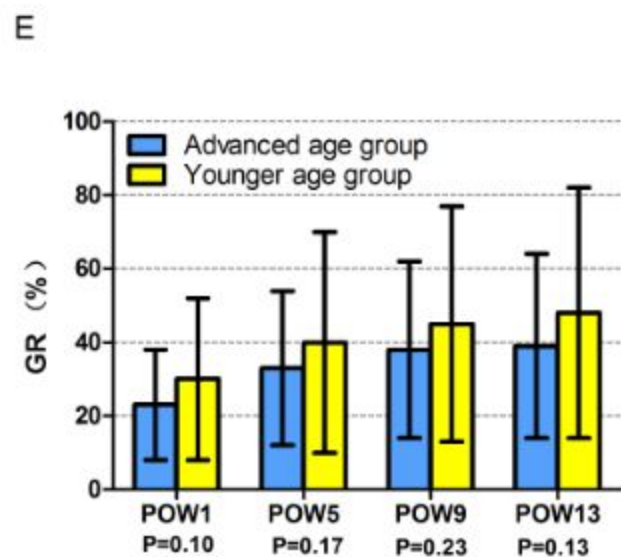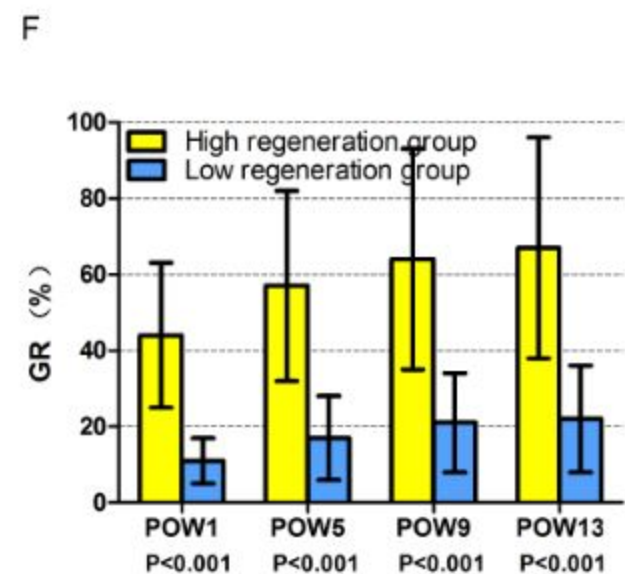

**A**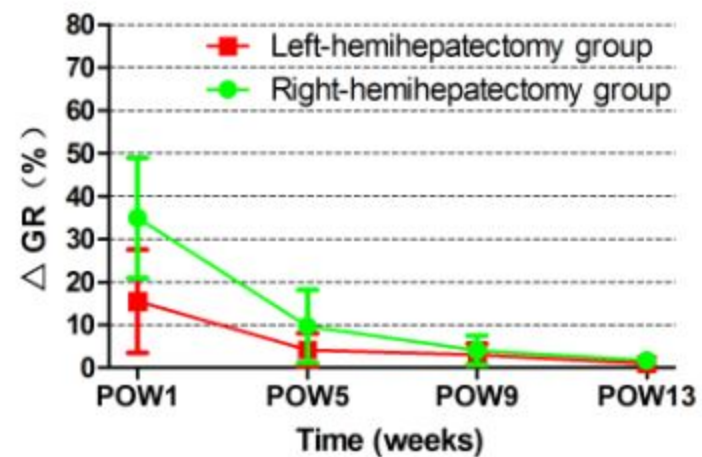**B**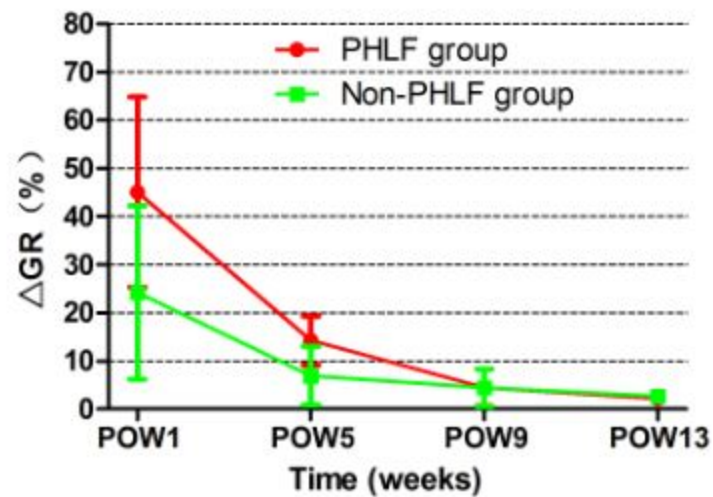**C**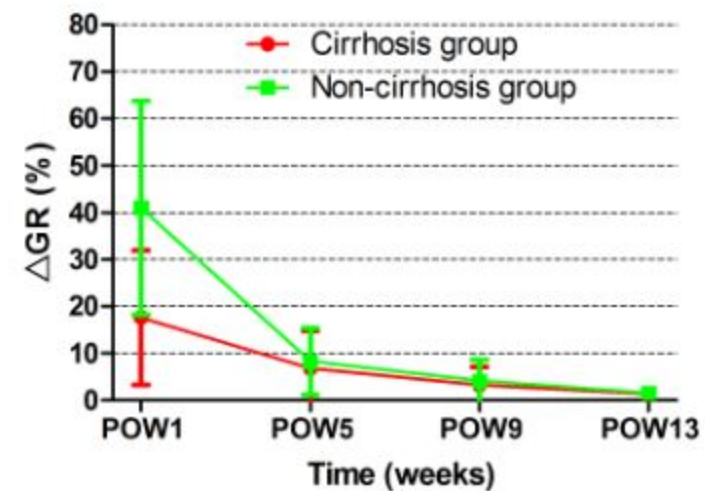**D**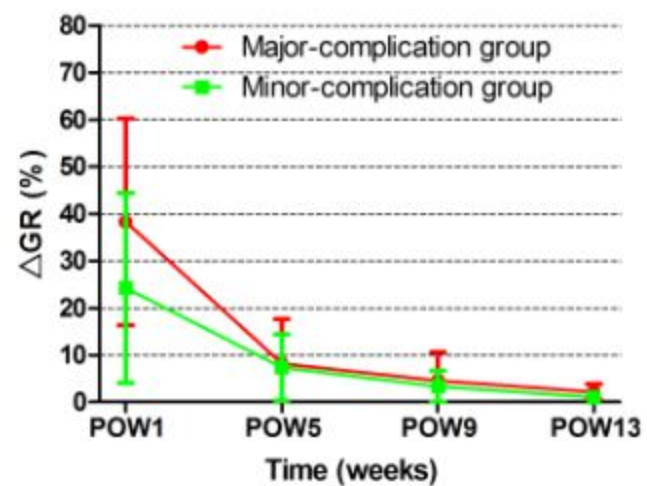**E**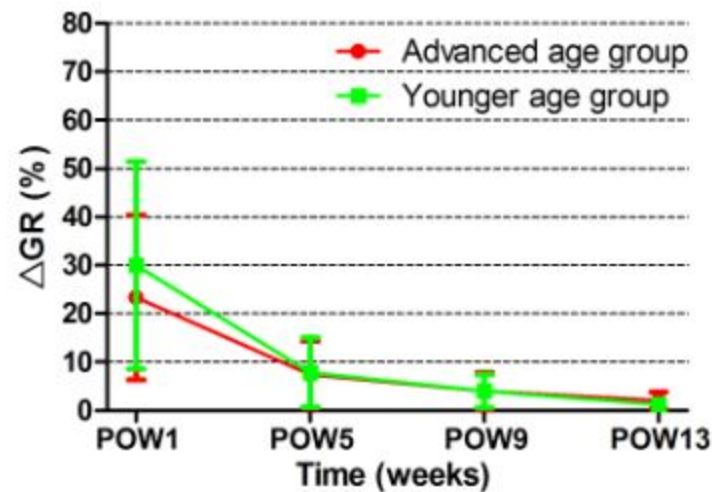**F**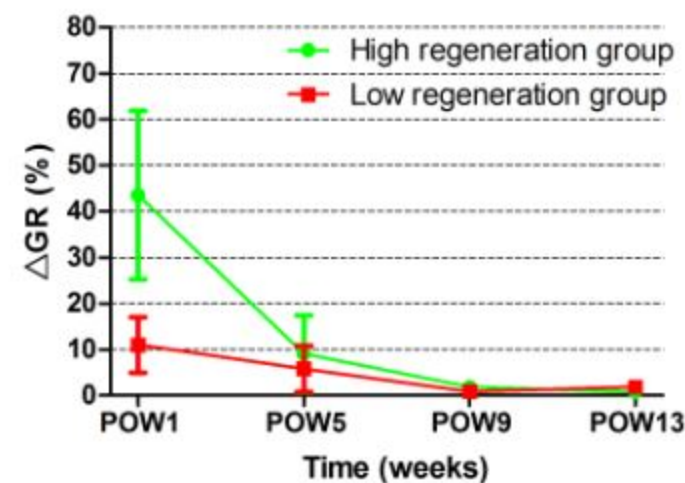

Table S1. Uni- and multivariate logistic regression to identify predictors of high extent of liver regeneration after hemihepatectomy.

| Variable<br>(n=125)                            | Univariate<br><i>P</i> | Multivariate<br>OR (95%CI) | <i>P</i> |
|------------------------------------------------|------------------------|----------------------------|----------|
| Gender (Male)                                  | 0.792                  |                            |          |
| Age* (> 47 yr)                                 | 0.647                  |                            |          |
| Body mass index* (>21.5 kg/m <sup>2</sup> )    | 0.282                  |                            |          |
| Body surface area* (>1.61 m <sup>2</sup> )     | 0.132                  |                            |          |
| Diabetes                                       | 0.375                  |                            |          |
| Positive for Hepatitis B Virus DNA             | 0.551                  |                            |          |
| Antiviral therapy                              | 0.200                  |                            |          |
| Alpha fetoprotein (≥200/<200ug/ml)             | 0.829                  |                            |          |
| Total bilirubin * (>12.3 μmol/L)               | 0.183                  |                            |          |
| Serum albumin* (>38.4 g/L)                     | 0.786                  |                            |          |
| Alanine aminotransferase * (>40 U/L)           | 0.100                  |                            |          |
| Aspartate aminotransferase * (>40 U/L)         | 0.179                  |                            |          |
| Prothrombin time * (>12.6 sec)                 | 0.932                  |                            |          |
| Platelet count* (>240.6 ×10 <sup>9</sup> /L)   | 0.920                  |                            |          |
| MELD score (>24)                               | 0.343                  |                            |          |
| Portal vein tumor thrombus                     | 0.242                  |                            |          |
| Duration of operation* (>253 min)              | 0.871                  |                            |          |
| Blood loss* (>400 ml)                          | 0.343                  |                            |          |
| Blood transfusion                              | 0.479                  |                            |          |
| Spleen volume* (>168.5 cm <sup>3</sup> )       | 0.629                  |                            |          |
| Resected liver volume* (>820 cm <sup>3</sup> ) | 0.382                  |                            |          |
| Liver cirrhosis                                | 0.001                  | 7.740 (2.748-21.798)       | <0.001   |
| Inflow blood occlusion (yes)                   | 0.004                  | 0.519 (0.188-1.439)        | 0.208    |
| Postoperative complications                    | 0.012                  | 1.588 (0.472-5.340)        | 0.455    |
| FLV* (>1005 cm <sup>3</sup> )                  | 0.008                  | 0.334 (0.101-1.106)        | 0.073    |
| Tumor volume* (>501 cm <sup>3</sup> )          | 0.017                  | 1.234 (0.439-3.466)        | 0.690    |

---

|                               |       |                     |       |
|-------------------------------|-------|---------------------|-------|
| FLRV* (<601 cm <sup>3</sup> ) | 0.004 | 0.230 (0.074-0.717) | 0.011 |
| %FLRV                         | 0.001 | 0.271 (0.077-0.960) | 0.043 |

---

\* Median values in the study population were used as cut-off values.

FLRV: Future Liver Remnant Volume; FLV: Functional Liver Volume
